# Supplementary material for: Isolation and characterization of native antagonistic rhizobacteria against Fusarium wilt of chilli to promote plant growth
Source: PeerJ. 2024 Jun 25;12:e17578. doi: 10.7717/peerj.17578 (PMC11212620; doi:10.7717/peerj.17578)
Supplement: Supplemental Information 1 [file peerj-12-17578-s001.xls]

## Sheet: Dual culture
							Dual culture Technique
			Radial growth (mm)				Per cent inhibition over control*				Inhibition zone (mm)
	Treat	R1	R2	R3	Mean				Treat	R1	R2	R3	Mean
	Iso-01	28	26	27	27		70		Iso-01	14.2	13.4	15.3	14.3
	Iso-17	29	32	35	32		64.4444		Iso-17	14	12	13	13
	Iso-23	34	37	31	34		62.2222		Iso-23	12.3	13.3	14.5	13.3667
	Iso-24	24.7	25.8	26.8	25.7667		71.3704		Iso-24	17.3	18.5	20.3	18.7
	Iso-32	22	25	25	24		73.3333		Iso-32	22.4	21	21.8	21.7333
	Control	90	90	90	90		0		Control	0	0	0	0
	SEM				1.132				SEM				0.572
	CD				3.49				CD				1.763

## Sheet: P solubilization
									Phosphate solubilization
				Solubilization zone						Culture diameter					Solubiliztion Efficiency (%)		Solubiliztion index
			Treat	R1	R2	R3	Mean		Treat	R1	R2	R3	Mean
			Iso 01	10.54	11.38	10.58	10.8333		Iso 01	8.9	8.7	8.5	8.7		124.521		1.24521
			Iso 06	9	10	8	9		Iso 06	7	7	7	7		128.571		1.28571
			Iso 14	13	11.85	12.14	12.33		Iso 14	4	4	4	4		308.25		3.0825
			Iso 15	11.33	10.41	10.75	10.83		Iso 15	9	8	10	9		120.333		1.20333
			Iso 17	14.57	14.32	14.11	14.3333		Iso 17	7	7	7	7		204.762		2.04762
			Iso 20	7.82	7.51	7.17	7.5		Iso 20	4.82	4.53	4.65	4.66667		160.714		1.60714
			Iso 24	7	7	7	7		Iso 24	6	6	6	6		116.667		1.16667
			Iso 32	3.54	3.85	4.11	3.83333		Iso 32	2.88	2.47	2.65	2.66667		143.75		1.4375
			SEM				0.29		SEM				0.64
			CD				0.87		CD				0.88

## Sheet: Seed treatment & seedling root 
					Seed treatment and seedling root dip treatment against Fusarium wilt
		Percent disease incidence (PDI)						Disease reduction over control (%)			Germination (%)
		Treat	R1	R2	R3	Mean					Treat	R1	R2	R3	Mean
		Iso-01	12.5	13.4	12.4	12.7667		79.071			Iso-01	86	82	84	84
		Iso-17	13.5	14.2	13.8	13.8333		77.3224			Iso-17	84	87	90	87
		Iso-23	12.7	13.2	12.8	12.9		78.8525			Iso-23	88	85	85	86
		Iso-24	10.4	10	10.2	10.2		83.2787			Iso-24	91	87	86	88
		Iso-32	9	8.7	8.8	8.83333		85.5191			Iso-32	93	89	94	92
		Control	58	64	61	61		0			Control	24	22	23	23
		SEM				0.72					SEM				1.41
		CD				2.24					CD				2.8

## Sheet: Rolled paper towel
									Rolled paper towel method
			Germination %						Root length (cm)					Soot length (cm)					Vigour Index
		Treat	R1	R2	R3	Mean			R1	R2	R3	Mean		R1	R2	R3	Mean
		Iso-01	90	87	93	90			3.87	3.69	3.69	3.75		4.56	4.21	4.78	4.51667			744
		Iso-17	93	90	92	91.6667			3.96	4.22	4.06	4.08		4.32	4.15	4.65	4.37333			774.889
		Iso-23	86	89	87	87.3333			4.78	4.46	4.52	4.58667		5.07	5.16	4.99	5.07333			843.64
		Iso-24	90	93	95	92.6667			5.06	5.12	4.93	5.03667		5.29	5.34	5.48	5.37			964.351
		Iso-32	97	98	95	96.6667			5.32	5.41	5.74	5.49		5.42	5.72	5.65	5.59667			1071.71
		Control	87	85	86	86			3.87	3.23	3.51	3.53667		3.56	3.76	3.84	3.72			624.073
		SEM				1.22		SEM				0.11	SEM				0.1
		CD				1.3		CD				0.33	CD				0.32

## Sheet: Seedling growth 
							Seedling growth parameters
									ROOT
			Length (cm)					Fresh weight (gm)					Dry weight (gm)
		Treat	R1	R2	R3	Mean		R1	R2	R3	Mean		R1	R2	R3	Mean
		Iso-01	12.95	13.14	13.47	13.1867		1.28	1.52	1.77	1.52333		0.77	0.85	0.91	0.843333
		Iso-17	11.47	11.23	11.59	11.43		0.88	0.83	0.95	0.886667		0.34	0.39	0.46	0.396667
		Iso-23	13.11	12.91	13.26	13.0933		1.44	1.31	1.49	1.41333		0.69	0.62	0.82	0.71
		Iso-24	12.74	12.86	12.58	12.7267		0.92	0.99	0.87	0.926667		0.41	0.46	0.38	0.416667
		Iso-32	14.78	14.53	14.93	14.7467		2.68	2.46	2.81	2.65		1.4	1.18	1.64	1.40667
		Control	8.34	7.96	8.18	8.16		0.69	0.54	0.62	0.616667		0.41	0.26	0.41	0.36
		SEM				0.97	SEM				0.07	SEM				0.05
		CD				0.31	CD				0.23	CD				0.17
									SHOOT
			Length (cm)					Fresh weight (gm)					Dry weight (gm)
		Treat	R1	R2	R3	Mean		R1	R2	R3	Mean		R1	R2	R3	Mean
		Iso-01	14.09	14.28	14.33	14.2333		3.19	3.38	3.56	3.37667		1.86	2.15	2.32	2.11
		Iso-17	12.19	12.04	12.14	12.1233		1.25	1.08	1.28	1.20333		0.85	0.91	1	0.92
		Iso-23	13.65	13.33	13.82	13.6		2.44	2.16	2.71	2.43667		1.67	1.52	1.84	1.67667
		Iso-24	12.87	13.42	13.21	13.1667		1.85	2.34	2.29	2.16		0.98	1.23	1.26	1.15667
		Iso-32	13.72	13.58	13.87	13.7233		2.32	2.18	2.45	2.31667		1.54	1.41	1.76	1.57
		Control	9.52	9.05	9.42	9.33		0.83	0.67	0.78	0.76		0.53	0.48	0.61	0.54
		SEM				0.11		SEM			0.09		SEM			0.06
		CD				0.35		CD			0.3		CD			0.19
